# Supplementary material for: An Outbreak of Carbapenem-Resistant and Hypervirulent Klebsiella pneumoniae in an Intensive Care Unit of a Major Teaching Hospital in Wenzhou, China
Source: PubMed Central journal article supplement (PMC6736603; doi:10.3389/fpubh.2019.00229), 2019-08-19
Supplement: Data_Sheet_1.pdf [file Data_Sheet_1.pdf]

## *Supplementary Material*

### 1 **1 Supplementary Figures and Tables**

#### 2 1.1 **Table S1.** List of oligonucleotide primers used in amplification of virulence-associated genes and capsular serotyping detection.

| <b>Gene/marker</b> | <b>Primer Sequence (5'---3')</b>                     | <b>T<sub>m</sub> (°C)</b> | <b>Amplicon size (bp)</b> | <b>Reference</b> |
|--------------------|------------------------------------------------------|---------------------------|---------------------------|------------------|
| <i>magA</i>        | F: GGTGCTCTTTACATCATTGC<br>R: GCAATGGCCATTTGCGTTAG   | 58                        | 1283                      | (1)              |
| <i>iutA</i>        | F: GTTGCGATTCTACCCGTTCC<br>R: GCCCGGTGGTGTAATCTTC    | 57                        | 248                       | this study       |
| <i>fepA</i>        | F: CCTGCCGATTGATTTCTCG<br>R: CGTTACGATGGTGCTGTCAG    | 57                        | 226                       | this study       |
| <i>fyuA</i>        | F: ATATGGCAAAAGCGCTCAGG<br>R: GGGTTAATCATGTCCGCGTC   | 57                        | 204                       | this study       |
| <i>iroD</i>        | F: GCATAGGCGGATACGAACAT<br>R: CACAGGGCAATTGCTTACCT   | 58                        | 556                       | this study       |
| <i>iroN</i>        | F: GGCTACTGATACTTGACTATTC<br>R: CAGGATACAATAGCCCATAG | 58                        | 992                       | (2)              |
| <i>kfuBC</i>       | F: GAAGTGACGCTGTTTCTGGC<br>R: TTTCGTGTGGCCAGTGACTC   | 58                        | 797                       | (3)              |
| <i>rmpA</i>        | F: ACTGGGCTACCTCTGCTTCA<br>R: CTTGCATGAGCCATCTTTCA   | 53                        | 535                       | (4)              |
| <i>wcaG</i>        | F: GGTTGGKTCAGCAATCGTA                               | 58                        | 169                       |                  |

|              |                                                      |    |     |            |
|--------------|------------------------------------------------------|----|-----|------------|
|              | R: ACTATTCCGCCAACTTTTGC                              |    |     | (5)        |
| <i>alls</i>  | F: CCGAAACATTACGCACCTTT<br>R: ATCACGAAGAGCCAGGTCAC   | 58 | 508 | (3)        |
| <i>ybtA</i>  | F: ATGACGGAGTCACCGCAAAC<br>R: TTACATCACGCGTTTAAAGG   | 55 | 960 | (6)        |
| <i>ureA</i>  | F: GACAAGCTGTTGCTGTTTACC<br>R: CGGGTTGTGAACGGTGAC    | 58 | 270 | (7)        |
| <i>uge</i>   | F: GATCATCCGGTCTCCCTGTA<br>R: TCTTCACGCCTTCCTTCACT   | 53 | 534 | (8)        |
| <i>wabG</i>  | F: CGGACTGGCAGATCCATATC<br>R: ACCATCGGCCATTTGATAGA   | 58 | 683 | (9)        |
| <i>entB</i>  | F: ATTTCTCAACTTCTGGGGC<br>R: AGCATCGGTGGCGGTGGTCA    | 56 | 371 | (1)        |
| <i>fimH</i>  | F: TGCTGCTGGGCTGGTCGATG<br>R: GGGAGGGTGACGGTGACATC   | 62 | 688 | (1)        |
| <i>mrkD</i>  | F: CCACCAACTATTCCCTCGAA<br>R: ATGGAACCCACATCGACATT   | 43 | 226 | (4)        |
| <i>iucA</i>  | F: ATCCACCAGCAGGTTTTTCAC<br>R: ATCCACCAGCAGGTTTTTCAC | 60 | 591 | this study |
| <i>rmpA2</i> | F: CGTATGAAGGCTCGATGGAT<br>R: TGTGCACCATTTTTCATCAG   | 60 | 639 | this study |
| <i>repA</i>  | F: GATATCCCGAAGTTGCTCCA<br>R: ACGTTAAGATCACCGGTTCG   | 60 | 545 | this study |
| <i>sopB</i>  | F: CCGAAGATGCTCTGGATGAT                              | 60 | 560 |            |

---

|                         |                                                                |    |      |            |
|-------------------------|----------------------------------------------------------------|----|------|------------|
|                         | R: TGATGCGGAAGATTGTTTCA                                        |    |      | this study |
| LV049                   | F: TGATGCGGAAGATTGTTTCA<br>R: GATCCAGCTGAAGTCGGTGT             | 60 | 509  | this study |
| LV206                   | F: TCCACAATCCTGCCTTTTTC<br>R: GGCTCATCAGGGTCAGGTAA             | 60 | 557  | this study |
| K1 (Capsular serotype)  | F: GGTGCTCTTTACATCATTGC<br>R: GCAATGGCCATTTGCGTTAG             | 54 | 1283 | (4)        |
| K2 (Capsular serotype)  | F: GACCCGATATTCATACTTGACAGAG<br>R: CCTGAAGTAAAATCGTAAATAGATGGC | 58 | 641  | (10)       |
| K5 (Capsular serotype)  | F: TGGTAGTGATGCTCGCGA<br>R: CCTGAACCCACCCCAATC                 | 58 | 280  | (10)       |
| K20 (Capsular serotype) | F: CGGTGCTACAGTGCATCATT<br>R: GTTATACGATGCTCAGTCGC             | 58 | 741  | (10)       |
| K54 (Capsular serotype) | F: CATTAGCTCAGTGGTTGGCT<br>R: GCTTGACAAACACCATAGCAG            | 58 | 881  | (10)       |
| K57 (Capsular serotype) | F: CTCAGGGCTAGAAGTGTCAT<br>R: CTCAGGGCTAGAAGTGTCAT             | 58 | 1037 | (10)       |

---

### 3 References

- 4 1. E. Candan and N. Aksöz: *Klebsiella pneumoniae*: characteristics of carbapenem resistance and virulence factors. *Acta Biochim. Pol.*, 62(4), 867-74  
5 (2015). doi: 10.18388/abp.2015\_1148.
- 6 2. P.-F. Hsieh, T.-L. Lin, C.-Z. Lee, S.-F. Tsai and J.-T. Wang: Serum-induced iron-acquisition systems and TonB contribute to virulence in *Klebsiella*  
7 *pneumoniae* causing primary pyogenic liver abscess. *Journal of Infectious Diseases*, 197(12), 1717-1727 (2008). doi: 10.1086/588383.
- 8 3. W. Yu, et al.: Comparison of prevalence of virulence factors for *Klebsiella pneumoniae* liver abscesses between isolates with capsular K1/K2 and non-  
9 K1/K2 serotypes. *Diagn. Microbiol. Infect. Dis.*, 62(1), 1-6 (2008). doi: 10.1016/j.diagmicrobio.2008.04.007

- 10 4. R. Wasfi, W. Elkhatib and H. Ashour: Molecular typing and virulence analysis of multidrug resistant *Klebsiella pneumoniae* clinical isolates recovered  
11 from Egyptian hospitals. *Sci Rep*, 6, 38929 (2016). doi: 10.1016/j.diagmicrobio.2008.04.007.
- 12 5. J. F. Turton, C. Perry, S. Elgohari and C. V. Hampton: PCR characterization and typing of *Klebsiella pneumoniae* using capsular type-specific, variable  
13 number tandem repeat and virulence gene targets. *Journal of medical microbiology*, 59(5), 541-547 (2010). doi: 10.1099/jmm.0.015198-0.
- 14 6. S. Zhang, et al.: Phenotypic and Genotypic Characterization of Isolated From Retail Foods in China. *Front Microbiol*, 9, 289 (2018). doi:  
15 10.1016/j.ijfoodmicro.2019.05.021
- 16 7. L. Zhan, et al.: Outbreak by hypermucoviscous *Klebsiella pneumoniae* ST11 isolates with carbapenem resistance in a tertiary hospital in China. *Frontiers*  
17 *in cellular and infection microbiology*, 7, 182 (2017). doi:10.3389/fcimb.2017.00182.
- 18 8. W. Yu, et al.: Association between *rmpA* and *magA* genes and clinical syndromes caused by *Klebsiella pneumoniae* in Taiwan. *Clin. Infect. Dis.*, 42(10),  
19 1351-8 (2006). doi: 10.3389/fcimb.2017.00182.
- 20 9. W.-H. Lin, et al.: Clinical and microbiological characteristics of *Klebsiella pneumoniae* isolates causing community-acquired urinary tract infections.  
21 *Infection*, 38(6), 459-464 (2010). doi: 10.1007/s15010-010-0049-5.
- 22 10. J. Turton, C. Perry, S. Elgohari and C. Hampton: PCR characterization and typing of *Klebsiella pneumoniae* using capsular type-specific, variable  
23 number tandem repeat and virulence gene targets. *J. Med. Microbiol.*, 59(Pt 5), 541-7 (2010). doi: 10.1099/jmm.0.015198-0.

25 1.2 **Table S2.** List of oligonucleotide primers used in amplification of resistance genes.

| <b>Gene</b>                          | <b>Primer Sequence (5'---3')</b>                      | <b>T<sub>m</sub> (°C)</b> | <b>Amplicon size (bp)</b> | <b>Reference</b> |
|--------------------------------------|-------------------------------------------------------|---------------------------|---------------------------|------------------|
| <i>bla</i> <sub>CTX-M-1</sub> group  | F: GGTAAAAAATCACTGCGTC<br>R: TTGGTGACGATTTTAGCCGC     | 48                        | 825-863                   | (1)              |
| <i>bla</i> <sub>CTX-M-2</sub> group  | F: ATGATGACTCAGAGCATTCG<br>R: TGGGTTACGATTTTCGCCGC    | 50                        | 827-865                   | (1)              |
| <i>bla</i> <sub>CTX-M-8</sub> group  | F: ATGGTACGACGAATGATATC<br>R: TAATCATAACAGAAGTCGCAG   | 48                        | 246                       | (2)              |
| <i>bla</i> <sub>CTX-M-9</sub> group  | F: ATGGTGACAAAGAGAGTGCA<br>R: CCCTTCGGCGATGATTCTC     | 50                        | 863-826                   | (1)              |
| <i>bla</i> <sub>CTX-M-25</sub> group | F: ATGATGAGAAAAAGCGTAAG<br>R: TTAATAACCGTCGGTGAC      | 50                        | 869                       | (3)              |
| <i>bla</i> <sub>CTX-M-65</sub>       | F: GCAGTACAGCGACAATACCG<br>R: TATCACCCACAGTCCACGAC    | 50                        | 320                       | This study       |
| <i>bla</i> <sub>SHV</sub>            | F: AACGCTTTCCCATGATGAGC<br>R: CGCCTCATTCAGTTCCGTTT    | 55                        | 322                       | This study       |
| <i>bla</i> <sub>TEM</sub>            | F: GGAACCGGAGCTGAATGAA<br>R: CAGTGCTGCAATGATACCGC     | 59                        | 254                       | This study       |
| <i>bla</i> <sub>VEB</sub>            | F: ACGGTAATTTAACCAGATAGG<br>R: ACCCGCCATTGCCTATGAGCC  | 46                        | 970                       | (4)              |
| <i>bla</i> <sub>CMY</sub>            | F: TGGCCAGAACTGACAGGCAAA<br>R: TTTCTCCTGAACGTGGCTGGC  | 60                        | 462                       | (5)              |
| <i>bla</i> <sub>DHA</sub>            | F: AACTTTCACAGGTGTGCTGGGT<br>R: CCGTACGCATACTGGCTTTGC | 50                        | 405                       | (6)              |

|                             |                                                             |    |      |            |
|-----------------------------|-------------------------------------------------------------|----|------|------------|
| <i>bla<sub>NDM-1</sub></i>  | F: TCTCGACATGCCGGGTTTCGG<br>R: ACCGAGATTGCCGAGCGACTT        | 57 | 475  | (7)        |
| <i>bla<sub>KPC-2</sub></i>  | F: CGCCAATTTGTTGCTGAAGG<br>R: CATAGTCATTTGCCGTGCCA          | 55 | 341  | This study |
| <i>bla<sub>OXA-23</sub></i> | F: AAGCCGCGCAAATACAGAAT<br>R: ATCCATTGCCCAACCAGTCT          | 50 | 463  | This study |
| <i>bla<sub>OXA-48</sub></i> | F: CGCATCTTGTGTCCAAGTG<br>R: TCGAGCATCAGCATTTTGTC           | 52 | 1012 | (8)        |
| <i>bla<sub>SPM</sub></i>    | F: CCTACAATCTAACGGCGACC<br>R: TCGCCGTGTCCAGGTATAAC          | 55 | 649  | (9)        |
| <i>bla<sub>VIM</sub></i>    | F: GGTCTCATTGTCCGTGATGGTGATGAG<br>R: CTCGATGAGAGTCCTTCTAGAG | 50 | 271  | (10)       |
| <i>bla<sub>GES</sub></i>    | F: AGAATTGACTCAGGCACCGA<br>R: TGTGTTGTCGCTCATCTCCT          | 59 | 864  | This study |
| <i>qnrA</i>                 | F: ATTTCTCACGCCAGGATTTG<br>R: GATCGGCAAAGGTTAGGTCA          | 48 | 627  | (11)       |
| <i>qnrB</i>                 | F: GATCGTGAAAGCCAGAAAGG<br>R: ACGATGCCTGGTAGTTGTCC          | 45 | 469  | (11)       |
| <i>qnrC</i>                 | F: GGGTTGTACATTTATTGAATCG<br>R: CACCTACCCATTTATTTTCA        | 50 | 307  | (12)       |
| <i>qnrD</i>                 | F: CGAGATCAATTTACGGGGAATA<br>R: AAC AAG CTG AAG CGC CTG     | 50 | 533  | (13)       |
| <i>qnrS</i>                 | F: ACGACATTCGTCAACTGCAA<br>R: TAAATTGGCACCCTGTAGGC          | 53 | 417  | (14)       |
| <i>qepA</i>                 | F: GAGATCATCATCACCAGCGC                                     | 58 | 573  | This study |

---

|              |                                                           |    |      |            |
|--------------|-----------------------------------------------------------|----|------|------------|
| <i>oqxA</i>  | R: ACCTTCCACGAGATCAAGCA<br>F: CACTATCAAAACCTCGCCCG        | 58 | 396  | This study |
| <i>gyrA</i>  | R: CCCAGGATTCAACCCCTTCT<br>F: CGCGTACTATACGCCATGAACGTA    | 55 | 441  | (15)       |
| <i>parC</i>  | R: ACCGTTGATCACTTCGGTCAGG<br>F: ATGTACGTGATCATGGACA       | 55 | 389  | (16)       |
| AAC (3')-Ia  | R: ATTCGGTGTAACGCATGG<br>F: ATGGGCATCATTCGCACATGTAGG      | 58 | 465  | (17)       |
| AAC (6')-Ib  | R: TTAGGTGGCGGTACTIONTGGGTC<br>F: TTGCGATGCTCTATGAGTGGCTA | 57 | 482  | (17)       |
| <i>rmtB</i>  | R: CTCGAATGCCTGGCGTGTTT<br>F: CCCAAACAGACCGTAGAGGC        | 50 | 585  | (18)       |
| <i>rmtC</i>  | R: CTCAAACCTCGGCGGGCAAGC<br>F: TGGTGGGATCGATGGGAAAA       | 50 | 271  | This study |
| <i>armA</i>  | R: GCCAGCCTCCGTAAAGAATG<br>F: AGGTTGTTTCCATTTCTGAG        | 50 | 591  | (18)       |
| ANT(3')-Ia   | R: TCTCTTCATTCCCTTCTCC<br>F: TTGCAGGTATCTTCGAGCCA         | 50 | 433  | This study |
| <i>mcr-1</i> | R: TTGCCGACTACCTTGGTGAT<br>F: GCTCGGTCAGTCCGTTTG          | 55 | 1586 | (19)       |
|              | R: GAATGCGGTGCGGTCTTT                                     |    |      |            |

---

26

27 **References**

- 28 1. M. Saladin, et al.: Diversity of CTX-M beta-lactamases and their promoter regions from *Enterobacteriaceae* isolated in three Parisian hospitals. *FEMS*  
29 *Microbiol Lett*, 209(2), 161-8 (2002). doi:10.1111/j.1574-6968.2002.tb11126.x
- 30 2. C. J. Munday, J. Xiong, C. Li, D. Shen and P. M. Hawkey: Dissemination of CTX-M type beta-lactamases in *Enterobacteriaceae* isolates in the People's  
31 Republic of China. *Int J Antimicrob Agents*, 23(2), 175-80 (2004). doi:10.1016/j.ijantimicag.2003.07.004
- 32 3. M. Cartelle, et al.: Characterisation of the first CTX-M-10-producing isolate of *Salmonella enterica* serotype Virchow. *Clin Microbiol Infect*, 12(3), 285-  
33 7 (2006). doi:10.1111/j.1469-0691.2005.01300.x
- 34 4. J. Schlesinger, et al.: Extended-spectrum beta-lactamases among *Enterobacter* isolates obtained in Tel Aviv, Israel. *Antimicrob Agents Chemother*, 49(3),  
35 1150-6 (2005). doi:10.1128/AAC.49.3.1150-1156.2005
- 36 5. J. Kim, et al.: CTX-M and SHV-12 beta-lactamases are the most common extended-spectrum enzymes in clinical isolates of *Escherichia coli* and  
37 *Klebsiella pneumoniae* collected from 3 university hospitals within Korea. *FEMS Microbiol Lett*, 245(1), 93-8 (2005). doi:10.1016/j.femsle.2005.02.029
- 38 6. F. J. Perez-Perez and N. D. Hanson: Detection of plasmid-mediated AmpC beta-lactamase genes in clinical isolates by using multiplex PCR. *J Clin*  
39 *Microbiol*, 40(6), 2153-62 (2002). doi:10.1128/jcm.40.6.2153-2162.2002
- 40 7. L. Hidalgo, et al.: Association of the novel aminoglycoside resistance determinant RmtF with NDM carbapenemase in *Enterobacteriaceae* isolated in  
41 India and the UK. *J Antimicrob Chemother*, 68(7), 1543-50 (2013). doi:10.1093/jac/dkt078
- 42 8. L. Ma, et al.: Emergence of OXA-48-Producing *Klebsiella pneumoniae* in Taiwan. *PLoS One*, 10(9), e0139152 (2015).  
43 doi:10.1371/journal.pone.0139152
- 44 9. G. Yu, et al.: First report of novel genetic array *aacA4-blaIMP-25-oxa30-catB3* and identification of novel metallo-beta-lactamase gene *bla<sub>IMP25</sub>*: A  
45 Retrospective Study of antibiotic resistance surveillance on *Pseudomonas aeruginosa* in Guangzhou of South China, 2003-2007. *Microb Pathog*, 95, 62-67  
46 (2016). doi:10.1016/j.micpath.2016.02.021
- 47 10. F. M. Kaczmarek, F. Dib-Hajj, W. Shang and T. D. Gootz: High-level carbapenem resistance in a *Klebsiella pneumoniae* clinical isolate is due to the  
48 combination of bla(ACT-1) beta-lactamase production, porin OmpK35/36 insertional inactivation, and down-regulation of the phosphate transport porin phoe.  
49 *Antimicrob Agents Chemother*, 50(10), 3396-406 (2006). doi:10.1128/AAC.00285-06
- 50 11. A. Robicsek, et al.: Fluoroquinolone-modifying enzyme: a new adaptation of a common aminoglycoside acetyltransferase. *Nat Med*, 12(1), 83-8 (2006).  
51 doi:10.1038/nm1347



- 52 12. H. B. Kim, et al.: Prevalence of plasmid-mediated quinolone resistance determinants over a 9-year period. *Antimicrob Agents Chemother*, 53(2), 639-45  
53 (2009). doi:10.1128/AAC.01051-08
- 54 13. L. M. Cavaco, H. Hasman, S. Xia and F. M. Aarestrup: *qnrD*, a novel gene conferring transferable quinolone resistance in *Salmonella enterica* serovar  
55 Kentucky and Bovismorbificans strains of human origin. *Antimicrob Agents Chemother*, 53(2), 603-8 (2009). doi:10.1128/AAC.00997-08
- 56 14. A. Robicsek, D. F. Sahm, J. Strahilevitz, G. A. Jacoby and D. C. Hooper: Broader distribution of plasmid-mediated quinolone resistance in the United  
57 States. *Antimicrob Agents Chemother*, 49(7), 3001-3 (2005). doi:10.1128/AAC.49.7.3001-3003.2005
- 58 15. S. Brisse and J. Verhoef: Phylogenetic diversity of *Klebsiella pneumoniae* and *Klebsiella oxytoca* clinical isolates revealed by randomly amplified  
59 polymorphic DNA, *gyrA* and *parC* genes sequencing and automated ribotyping. *Int J Syst Evol Microbiol*, 51(Pt 3), 915-24 (2001). doi:10.1099/00207713-  
60 51-3-915
- 61 16. Y. S. Nam, et al.: Investigation of mutation distribution in DNA gyrase and topoisomerase IV genes in ciprofloxacin-non-susceptible *Enterobacteriaceae*  
62 isolated from blood cultures in a tertiary care university hospital in South Korea, 2005-2010. *Int J Antimicrob Agents*, 41(2), 126-9 (2013).  
63 doi:10.1016/j.ijantimicag.2012.10.004
- 64 17. B. C. Haldorsen, G. S. Simonsen, A. Sundsfjord, O. Samuelsen and R. Norwegian Study Group on Aminoglycoside: Increased prevalence of  
65 aminoglycoside resistance in clinical isolates of *Escherichia coli* and *Klebsiella* spp. in Norway is associated with the acquisition of AAC(3)-II and AAC(6')-  
66 Ib. *Diagn Microbiol Infect Dis*, 78(1), 66-9 (2014). doi:10.1016/j.diagmicrobio.2013.10.001
- 67 18. L. Ma, et al.: Widespread dissemination of aminoglycoside resistance genes *armA* and *rmtB* in *Klebsiella pneumoniae* isolates in Taiwan producing  
68 CTX-M-type extended-spectrum beta-lactamases. *Antimicrob Agents Chemother*, 53(1), 104-11 (2009). doi:10.1128/AAC.00852-08
- 69 19. J. Quan, et al.: Prevalence of *mcr-1* in *Escherichia coli* and *Klebsiella pneumoniae* recovered from bloodstream infections in China: a multicentre  
70 longitudinal study. *Lancet Infect Dis*, 17(4), 400-410 (2017). doi:10.1016/S1473-3099(16)30528-X

71

72

| Isolates<br>(*-hvKp) | MIC ( $\mu\text{g/mL}$ ) |      |              |      |      |      |             |     |            |       |        |     | ST<br>type | PFGE<br>cluster |
|----------------------|--------------------------|------|--------------|------|------|------|-------------|-----|------------|-------|--------|-----|------------|-----------------|
|                      | Aminoglycosides          |      | Beta-lactams |      |      |      | Carbapenems |     | Quinolones |       | Others |     |            |                 |
|                      | GEN                      | TOB  | AMP          | CEZ  | CAZ  | CTR  | IMP         | ETP | LVFX       | CPFX  | PLB    | TGC |            |                 |
| Kp1*                 | 0.5                      | 0.5  | >128         | >128 | >128 | >64  | 64          | >64 | 32         | 64    | 0.25   | 2   | 11         | E               |
| Kp2                  | 32                       | 0.5  | >128         | >128 | >128 | >64  | 16          | >64 | 32         | 64    | 0.5    | 2   | 11         | E               |
| Kp3                  | >128                     | >128 | >128         | >128 | >128 | >64  | 32          | >64 | 128        | >64   | 1      | 2   | 11         | E               |
| Kp4                  | >128                     | >128 | >128         | >128 | >128 | >64  | 32          | >64 | 64         | >64   | 0.125  | 2   | 11         | E               |
| Kp5                  | >128                     | >128 | >128         | >128 | >128 | >64  | 32          | >64 | 64         | 64    | 0.25   | 2   | 11         | E               |
| Kp6*                 | 1                        | 0.5  | 64           | 8    | 4    | 1    | <0.25       | >64 | 0.25       | <0.25 | 0.5    | 2   | 375        | B               |
| Kp7                  | >128                     | >128 | >128         | >128 | 64   | >64  | 32          | >64 | 16         | 64    | 1      | 2   | 11         | C               |
| Kp8                  | >128                     | >128 | >128         | >128 | >128 | >64  | 16          | >64 | 64         | >64   | 2      | 2   | 11         | E               |
| Kp9                  | >128                     | >128 | >128         | >128 | >128 | >64  | 32          | >64 | 64         | 64    | 1      | 2   | 11         | E               |
| Kp10                 | >128                     | >128 | >128         | >128 | >128 | 64   | 8           | >64 | 32         | 64    | 0.5    | 2   | 37         | A               |
| Kp11                 | >128                     | >128 | >128         | >128 | >128 | >64  | 32          | >64 | 64         | 64    | 0.25   | 2   | 11         | E               |
| Kp12                 | >128                     | >128 | >128         | >128 | >128 | >64  | 32          | >64 | 64         | 64    | >64    | 1   | 11         | E               |
| Kp13                 | >128                     | >128 | >128         | >128 | >128 | >64  | 32          | >64 | 64         | 64    | 0.5    | 2   | 11         | E               |
| Kp14                 | >128                     | >128 | >128         | >128 | >128 | >64  | 32          | >64 | 64         | >64   | 0.25   | 2   | 11         | E               |
| Kp15*                | >128                     | >128 | >128         | >128 | >128 | >64  | 16          | >64 | 64         | 64    | 0.25   | 1   | 11         | E               |
| Kp16                 | 64                       | 4    | >128         | >128 | >128 | >64  | 32          | 64  | 4          | 4     | 0.125  | 2   | 37         | A               |
| Kp17                 | >128                     | >128 | >128         | >128 | >128 | >128 | 64          | 128 | 64         | 128   | 0.5    | 2   | 11         | E               |
| Kp18*                | >128                     | >128 | >128         | >128 | >128 | >128 | 64          | 128 | 64         | 128   | 1      | 2   | 11         | E               |

|      |      |      |      |      |      |      |     |      |     |     |       |   |    |   |
|------|------|------|------|------|------|------|-----|------|-----|-----|-------|---|----|---|
| Kp19 | >128 | >128 | >128 | >128 | >128 | >64  | 64  | 64   | 64  | 64  | 0.125 | 2 | 11 | D |
| Kp20 | >128 | >128 | 128  | >128 | >128 | >64  | 64  | >64  | 64  | >64 | 0.25  | 2 | 11 | D |
| Kp21 | >128 | >128 | >128 | >128 | >128 | >64  | 64  | 64   | 64  | 64  | 32    | 1 | 11 | D |
| Kp22 | 2    | >128 | >128 | >128 | 128  | >64  | 128 | >64  | 128 | >64 | <0.06 | 2 | 11 | E |
| Kp23 | 0.5  | >128 | >128 | >128 | 128  | >64  | 128 | >64  | 128 | >64 | 0.25  | 8 | 11 | E |
| Kp24 | >128 | >128 | >128 | >128 | >128 | >128 | 32  | >128 | 64  | 128 | 1     | 1 | 11 | D |
| Kp25 | >128 | >128 | >128 | >128 | >128 | >128 | 32  | >128 | 64  | 128 | 0.25  | 1 | 11 | D |
| Kp26 | >128 | >128 | >128 | >128 | >128 | >128 | 32  | >128 | 128 | 128 | 0.25  | 1 | 11 | D |
| Kp27 | 0.5  | 0.25 | >128 | >128 | >128 | >128 | 16  | >128 | 128 | 16  | 1     | 2 | 11 | E |
| Kp28 | 0.5  | 0.25 | >128 | >128 | >128 | 64   | 16  | 128  | 64  | 32  | 1     | 2 | 11 | E |
| Kp29 | 0.5  | 0.25 | >128 | >128 | >128 | >128 | 32  | >128 | 128 | 32  | 1     | 2 | 11 | E |

74 GEN: Gentamicin, TOB: Tobramycin, AMP: Ampicillin, CEZ: Cefazolin, CAZ: Ceftazidime, CTRX: Ceftriaxone, IMP: Imipenem, ETP: Ertapenem, LVFX:

75 Levofloxacin, CPMX: Ciprofloxacin, PLB: Polymyxin B, TGC: Tigecycline

76 Asterisk: Hypermucoviscous *Klebsiella pneumoniae*

#### 1.4 Supplementary Figure S1.

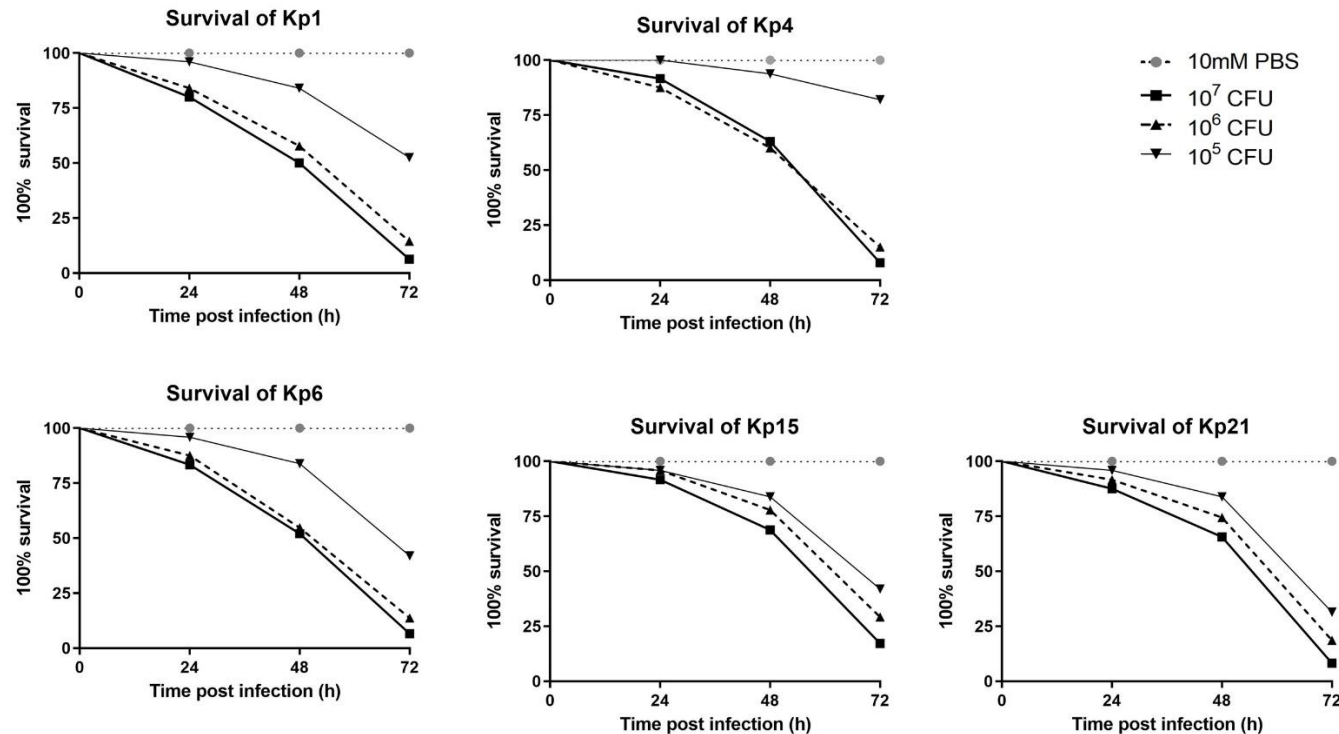

**Supplement Figure S1. *K. pneumoniae* infection of *G. mellonella* larvae induces dose-dependent lethality.** The effect of varies colony-forming units (CFU) of each *K pneumoniae* strain on survival was observed in *G mellonella*. Larvae were injected with PBS or with 10<sup>5</sup> /10<sup>6</sup> /10<sup>7</sup> CFU of Kp1, Kp4, Kp6, Kp15 and Kp21. The survival was monitored over 72 h post-infection. Mortality of larvae infected with Kp1, Kp4, Kp6, Kp15 and Kp21 were dose-dependent.
